# Supplementary material for: A new metal-free benzorhodol-based photoluminophore selective for carbon monoxide detection applicable in both in vitro and in vivo bioimaging
Source: Royal Society of Chemistry journal article supplement (doi:10.1039/d2ay00835a), 2022-01-01
Supplement: d2ay00835a1.pdf [file d2ay00835a1.pdf]

## Supporting Information

For

### A new metal-free benzorhodol-based photoluminophore selective for carbon monoxide detection applicable in both *in vitro* and *in vivo* bioimaging

Ejaj Ahmed<sup>a</sup>, Debanjan Sarkar<sup>b</sup>, Asit Mondal<sup>a</sup>, Nimai Chandra Saha<sup>c</sup>, Sankar Bhattacharyya<sup>b</sup>,  
Pabitra Chattopadhyay<sup>a,\*</sup>

<sup>a</sup>Department of Chemistry, The University of Burdwan, Golapbag, Burdwan-713104, West Bengal, India

<sup>b</sup>Immunobiology and Translational Medicine Laboratory, Department of Zoology, Sidho-Kanho-Birsha University, Purulia- 723104, West Bengal, India

<sup>c</sup>Vice Chancellor's Research Group, The University of Burdwan, Burdwan-713104, West Bengal, India

#### Content

1. Fig. S1. <sup>1</sup>H NMR spectrum of DEB-CO in DMSO-d<sub>6</sub>
2. Fig. S2. <sup>13</sup>C NMR spectrum of DEB-CO in DMSO-d<sub>6</sub>
3. Fig. S3. <sup>1</sup>H NMR spectrum of DEB-HY in DMSO-d<sub>6</sub>
4. Fig. S4. <sup>13</sup>C NMR spectrum of DEB-HY in DMSO-d<sub>6</sub>
5. Fig. S5. ESI-Mass spectrum of DEB-HY
6. Fig. S6. ESI-Mass spectrum of DEB-CO
7. Fig. S7. IR spectrum of DEB-HY
8. Fig. S8. IR spectrum of DEB-CO
9. Fig. S9. ESI-Mass (Negative mode) spectrum of DEB-CO with CORM-3
10. Fig. S10. ESI-Mass (Positive Mode) spectrum of DEB-CO with CORM-3
11. Fig. S11. IR spectra (A) DEB-CO and (B) DEB-CO with CORM-3
12. Fig. S12. Fluorescence intensity of DEB-CO toward (a) various biomolecules (b) Effects of pH on the fluorescence of DEB-CO (10 μM) with 20 μM CORM-3 at λ<sub>em</sub> ~ 629 nm.
13. Fig. S13. selectivity and interference bar plot
14. Fig. S14: Fluorescence emission intensities of DEB-CO (10 μM) at 629 nm vs. [CORM-3]
15. Fig. S15. Fluorescence intensity changes of DEB-CO (10 μM) solution after continuous CO gas ventilation.
16. Fig. S 16. Cytotoxicity measurement of the Probe against MCF7 cells.
17. Fig. S17: The mean grey value of CORM-3 at different concentration.
18. Comparison of 'analytical figure of merit' with the other previous works

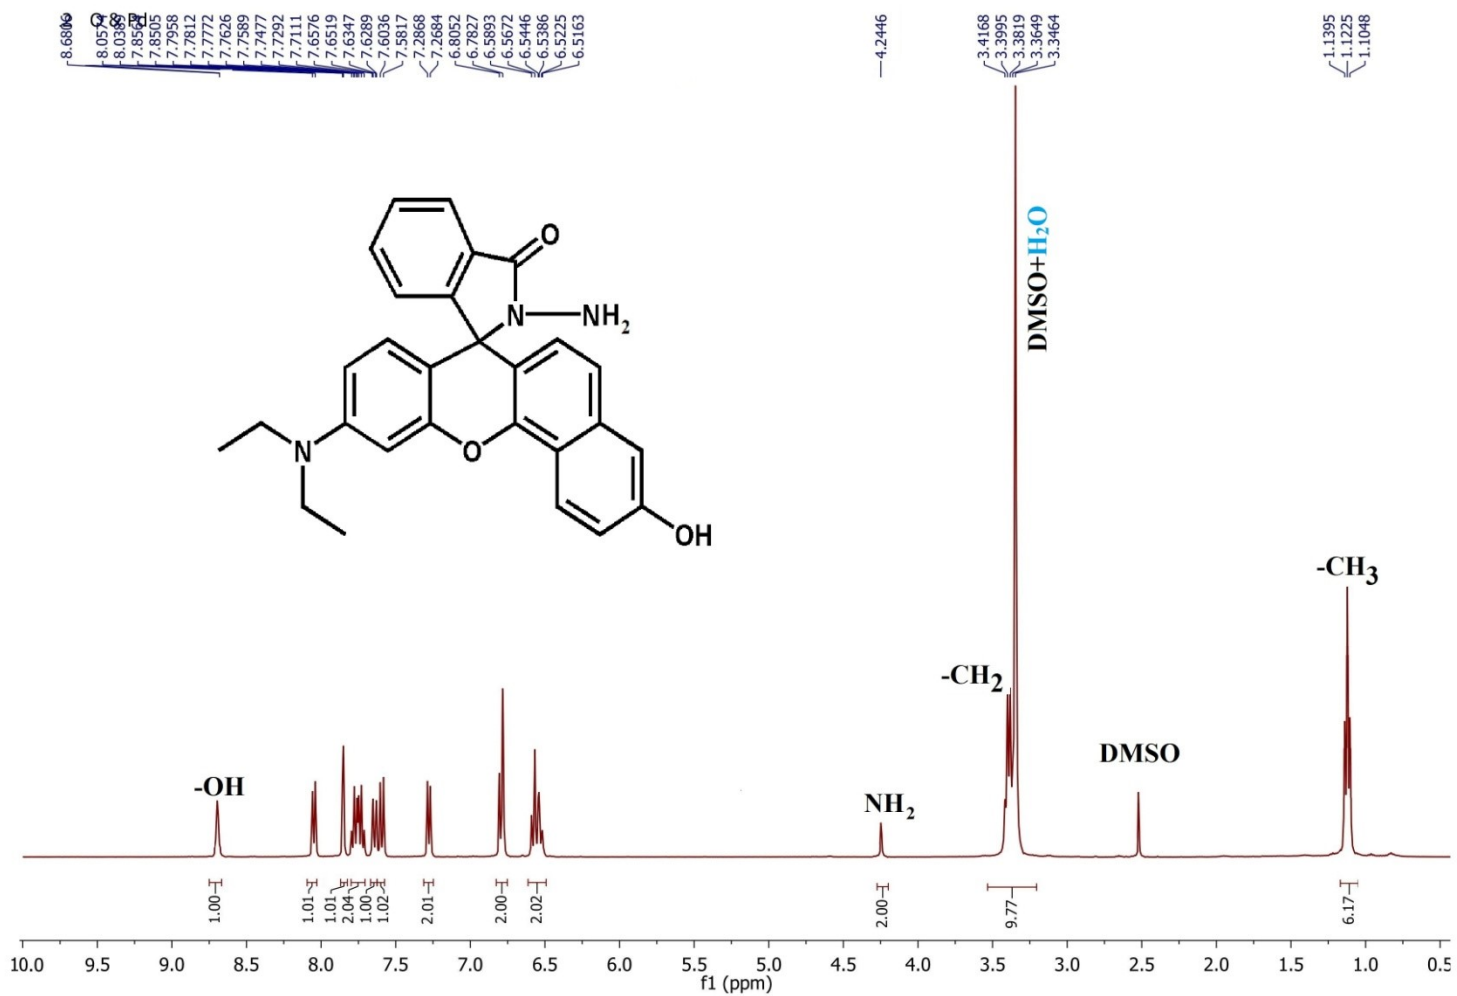

**Fig. S1.** <sup>1</sup>H NMR spectrum of DEB-HY in DMSO-d<sub>6</sub>

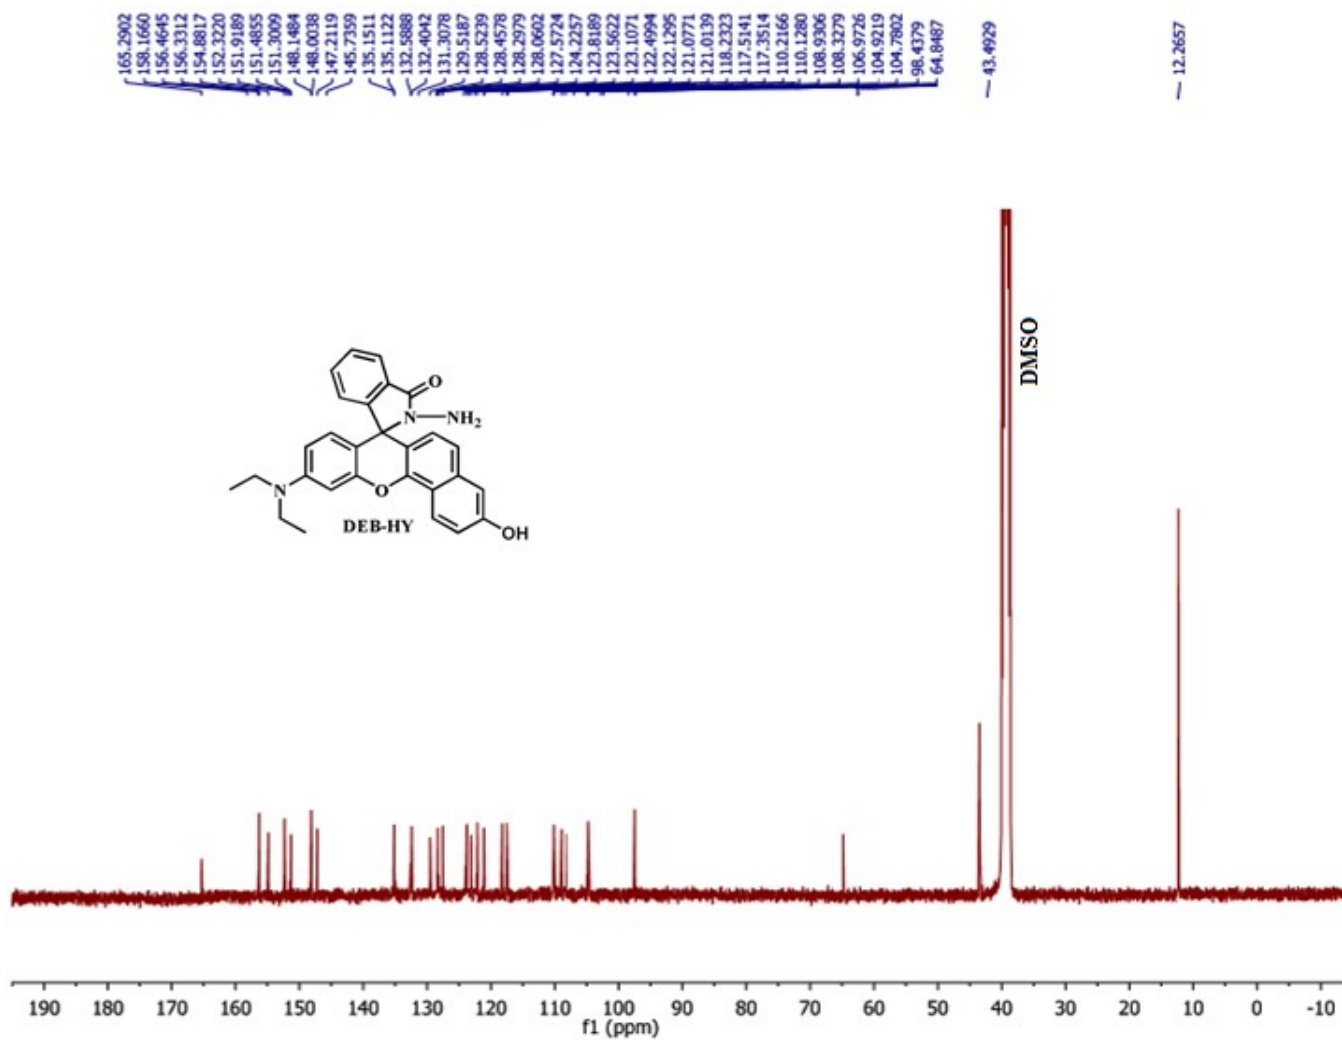

**Fig. S2.**  $^{13}\text{C}$  NMR spectrum of **DEB-HY** in  $\text{DMSO-d}_6$

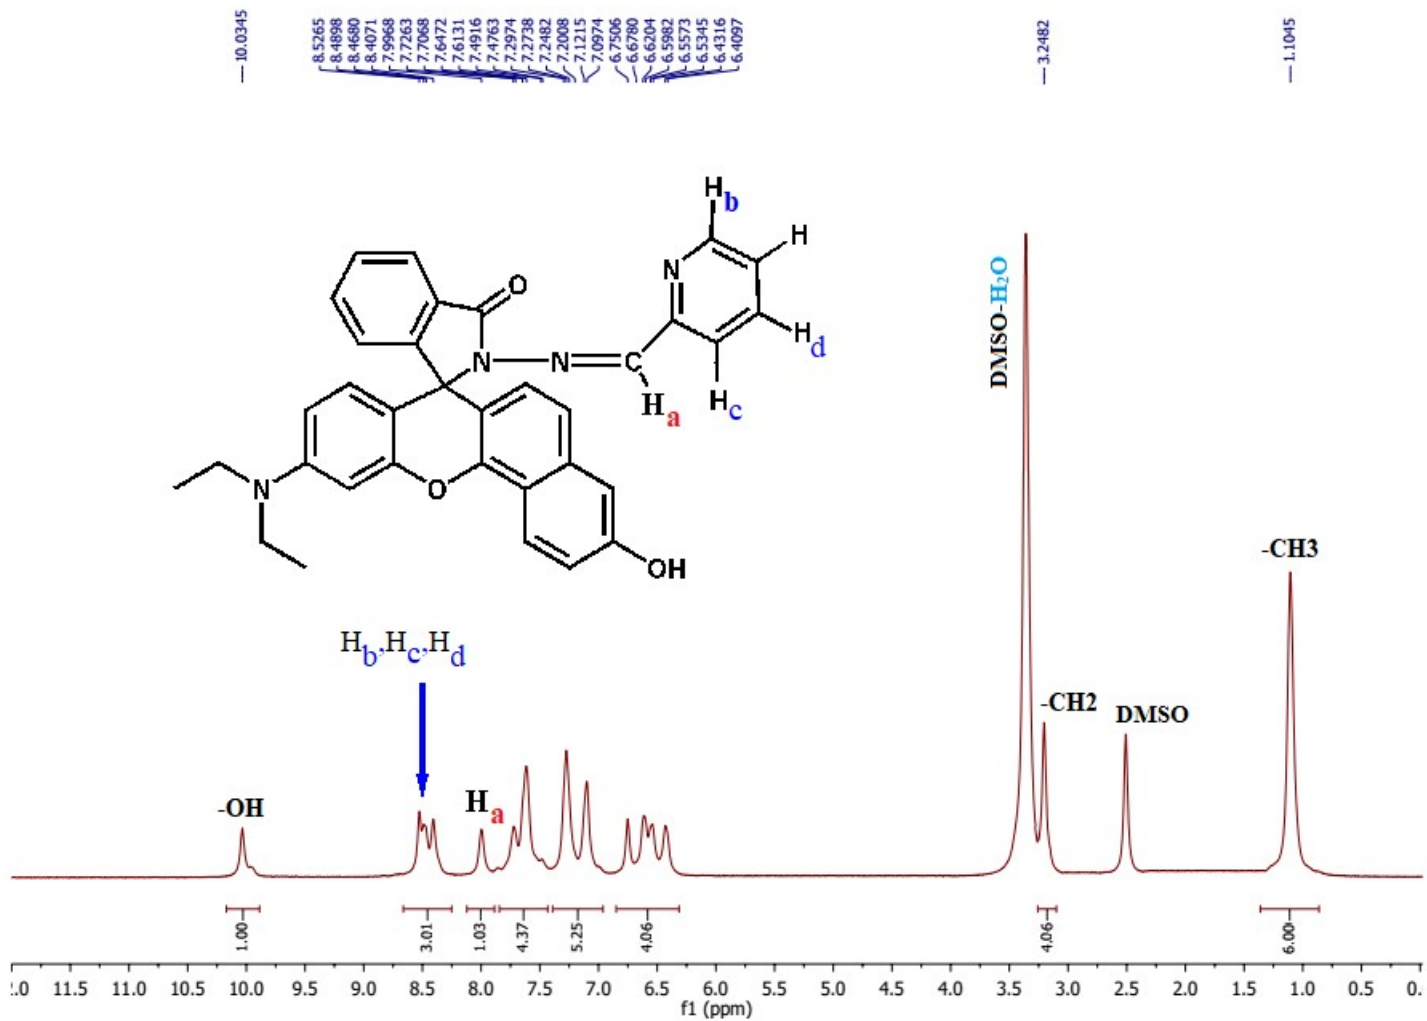

Fig. S3.  $^1H$  NMR spectrum of DEB-CO in DMSO- $d_6$

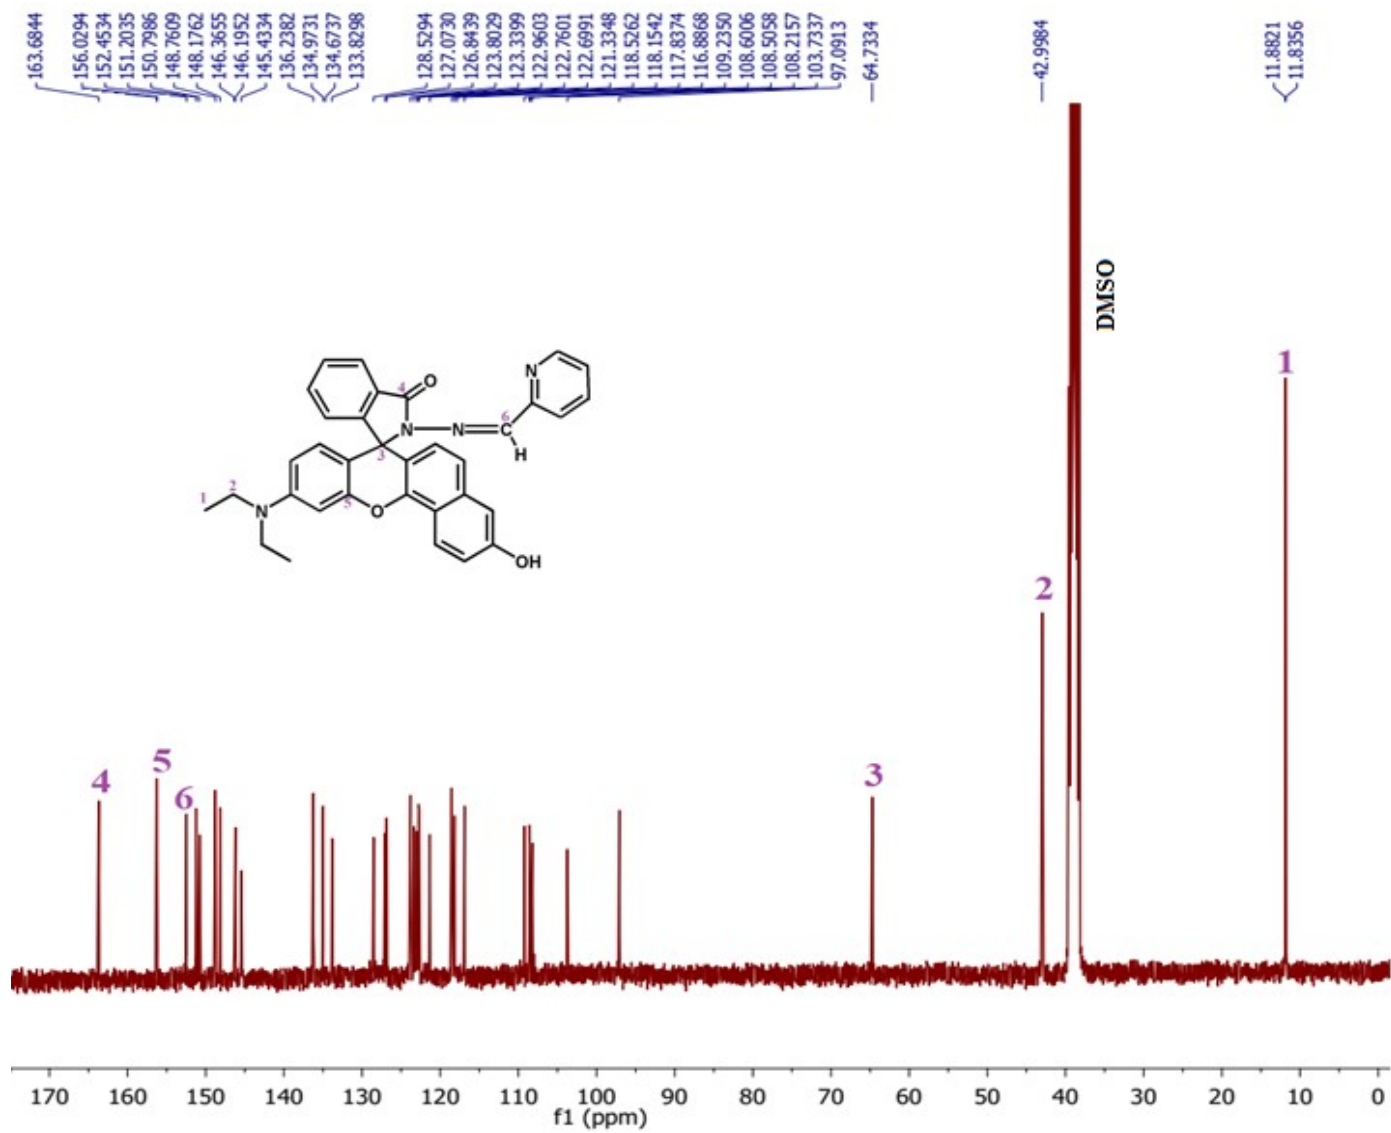

Fig. S4.  $^{13}\text{C}$  NMR spectrum of DEB-CO in DMSO- $d_6$

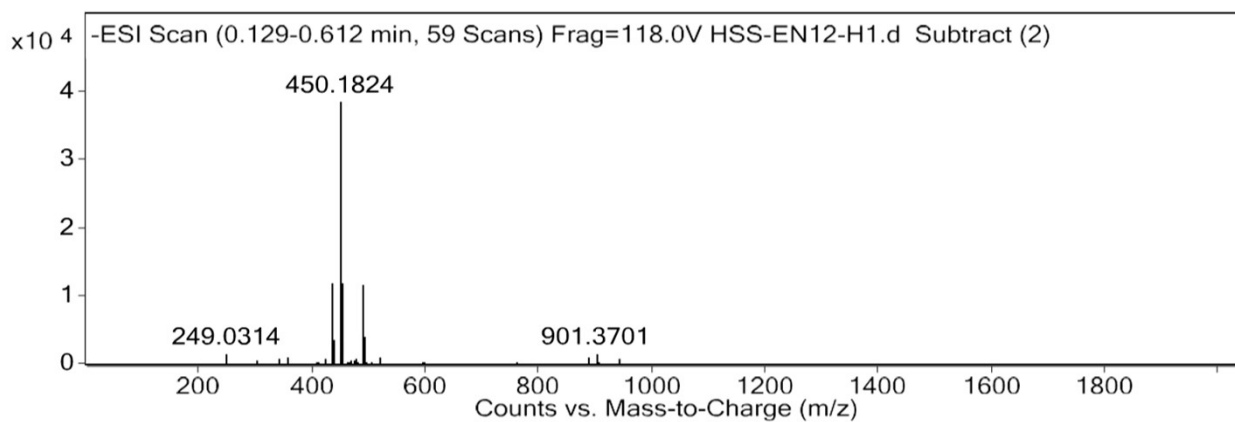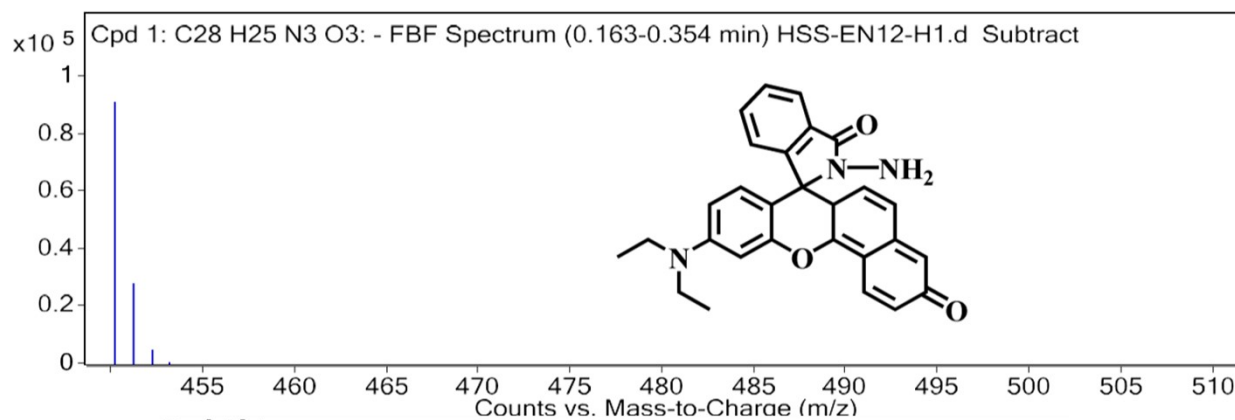

**Peak List**

| <i>m/z</i> | <i>z</i> | Abund    | Formula                                                       | Ion                                  |
|------------|----------|----------|---------------------------------------------------------------|--------------------------------------|
| 450.1825   | 1        | 91588.13 | C <sub>28</sub> H <sub>24</sub> N <sub>3</sub> O <sub>3</sub> | (M-H) <sup>-</sup>                   |
| 451.1851   | 1        | 28445.2  | C <sub>28</sub> H <sub>24</sub> N <sub>3</sub> O <sub>3</sub> | (M-H) <sup>-</sup>                   |
| 452.1874   | 1        | 5363.49  | C <sub>28</sub> H <sub>24</sub> N <sub>3</sub> O <sub>3</sub> | (M-H) <sup>-</sup>                   |
| 453.1872   | 1        | 890.68   | C <sub>28</sub> H <sub>24</sub> N <sub>3</sub> O <sub>3</sub> | (M-H) <sup>-</sup>                   |
| 454.185    | 1        | 140.05   | C <sub>28</sub> H <sub>24</sub> N <sub>3</sub> O <sub>3</sub> | (M-H) <sup>-</sup>                   |
| 510.2062   | 1        | 84.52    | C <sub>30</sub> H <sub>28</sub> N <sub>3</sub> O <sub>5</sub> | (M+CH <sub>3</sub> COO) <sup>-</sup> |

**Fig. S5.** ESI-Mass spectrum of **DEB-HY**

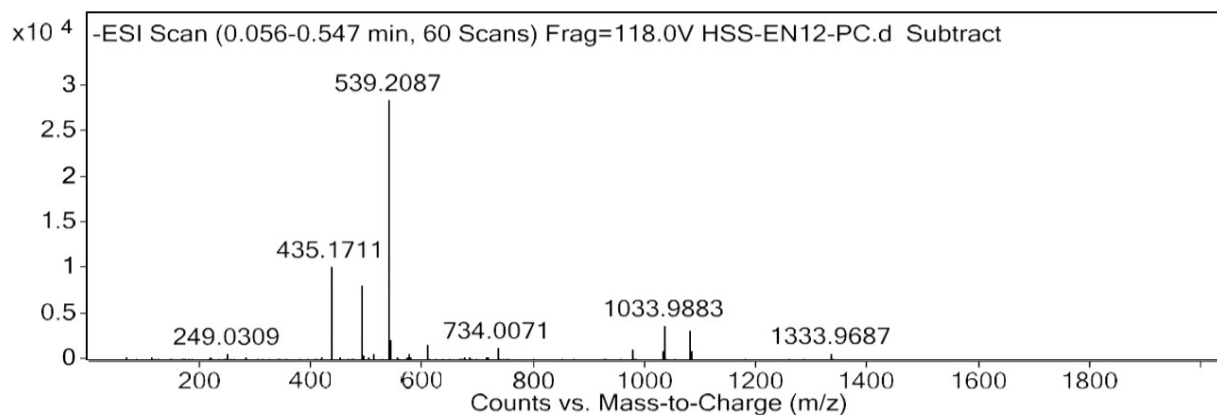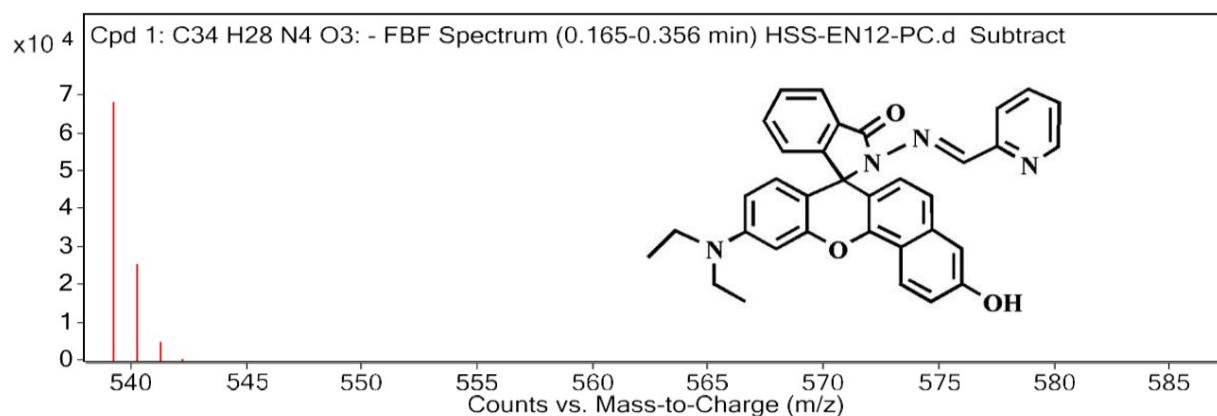

**Peak List**

| <i>m/z</i> | <i>z</i> | Abund    | Formula                                                       | Ion                   |
|------------|----------|----------|---------------------------------------------------------------|-----------------------|
| 539.2086   | 1        | 68522.02 | C <sub>34</sub> H <sub>27</sub> N <sub>4</sub> O <sub>3</sub> | (M-H) <sup>-</sup>    |
| 540.2115   | 1        | 25849.61 | C <sub>34</sub> H <sub>27</sub> N <sub>4</sub> O <sub>3</sub> | (M-H) <sup>-</sup>    |
| 541.2143   | 1        | 5344.32  | C <sub>34</sub> H <sub>27</sub> N <sub>4</sub> O <sub>3</sub> | (M-H) <sup>-</sup>    |
| 542.2167   | 1        | 931.74   | C <sub>34</sub> H <sub>27</sub> N <sub>4</sub> O <sub>3</sub> | (M-H) <sup>-</sup>    |
| 543.2052   | 1        | 68.61    | C <sub>34</sub> H <sub>27</sub> N <sub>4</sub> O <sub>3</sub> | (M-H) <sup>-</sup>    |
| 585.2207   | 1        | 101.48   | C <sub>35</sub> H <sub>29</sub> N <sub>4</sub> O <sub>5</sub> | (M+HCOO) <sup>-</sup> |
| 586.208    | 1        | 23.83    | C <sub>35</sub> H <sub>29</sub> N <sub>4</sub> O <sub>5</sub> | (M+HCOO) <sup>-</sup> |

**Fig. S6.** ESI-Mass spectrum of **DEB-CO**

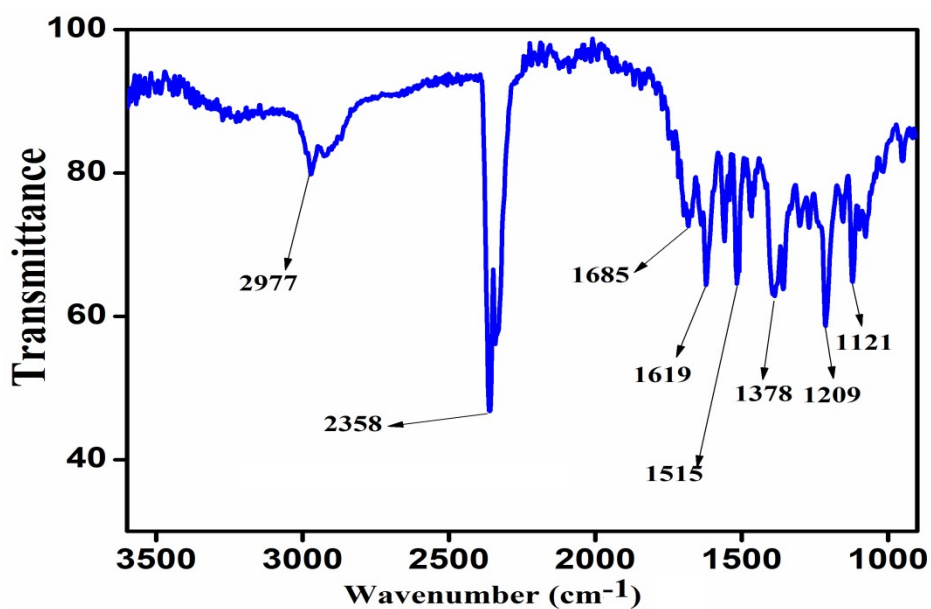

Fig. S7: FT-IR (cm<sup>-1</sup>) spectra of DEB-HY in solid state.

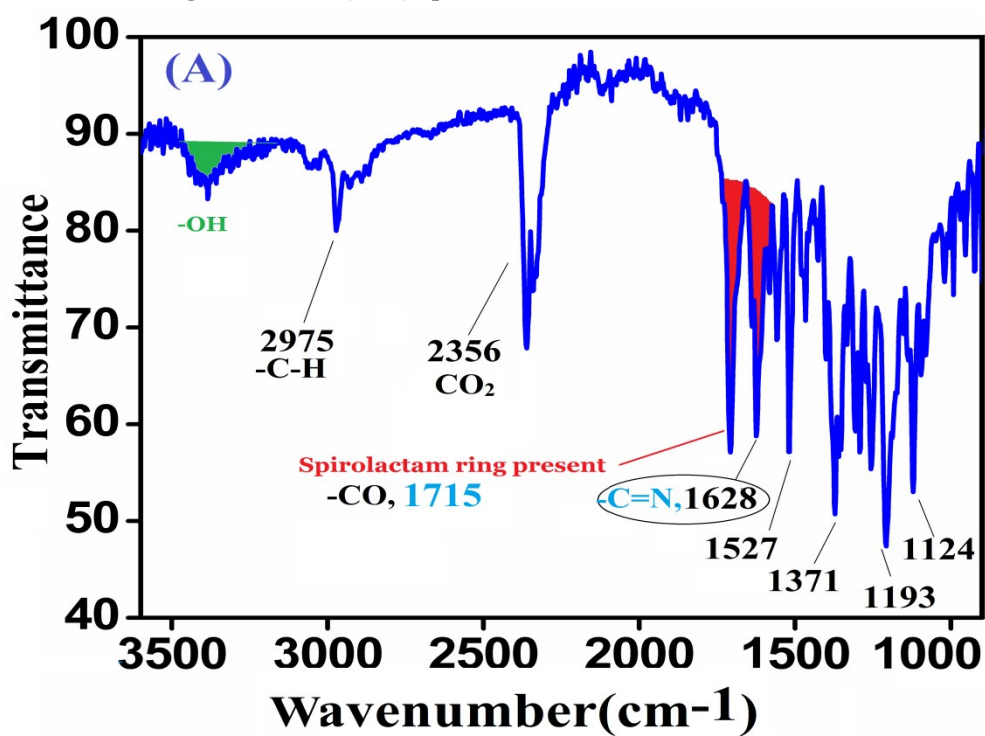

Fig. S8. FT-IR (cm<sup>-1</sup>) spectra of DEB-CO in solid state.



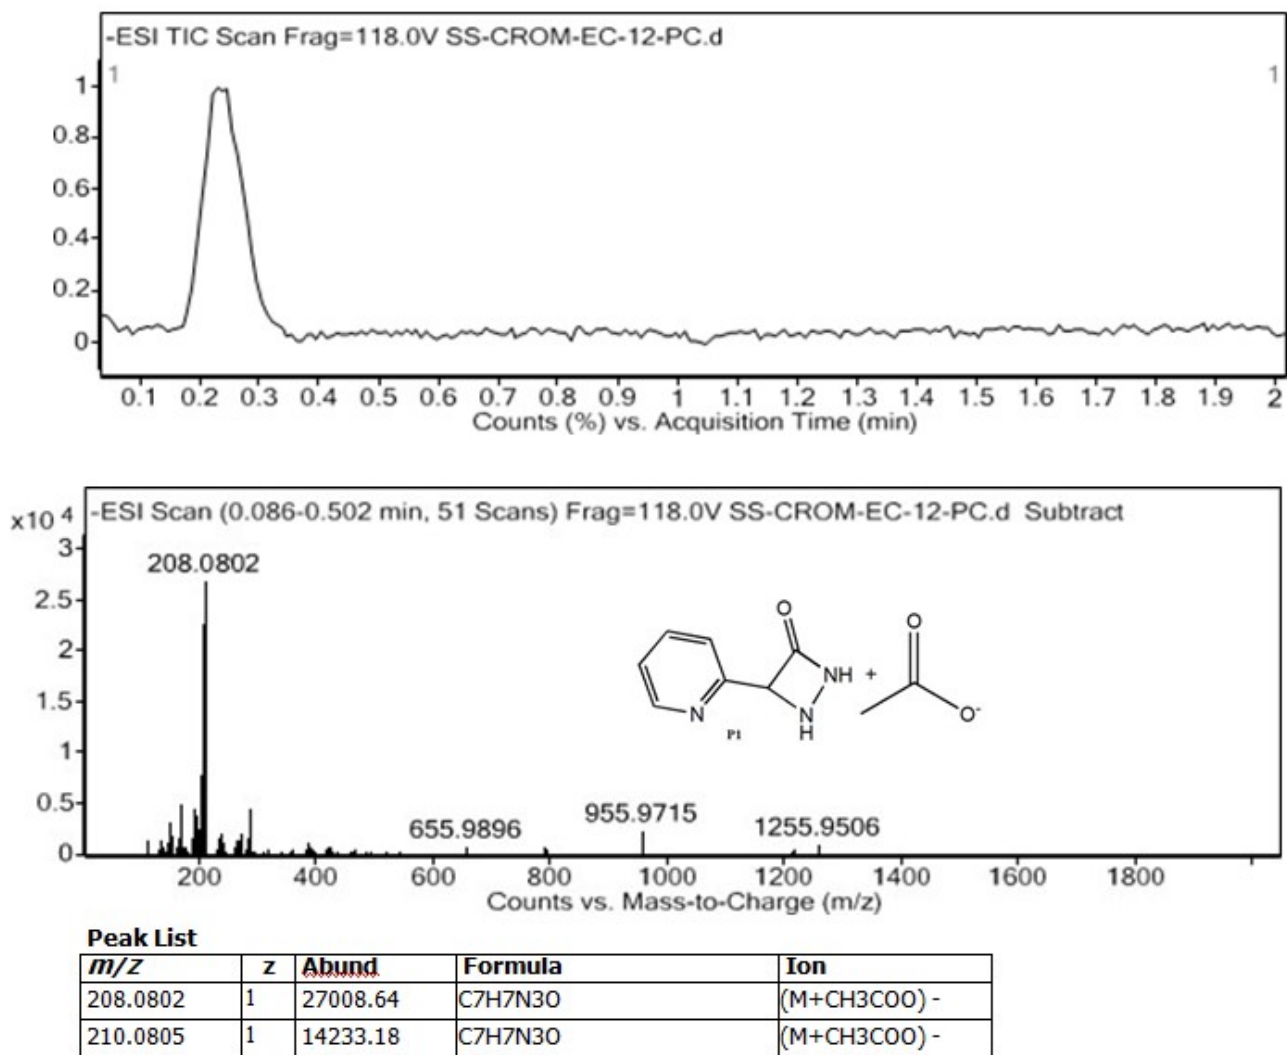

Fig. S9. ESI-Mass (Negative mode) spectrum of DEB-CO with CORM-3

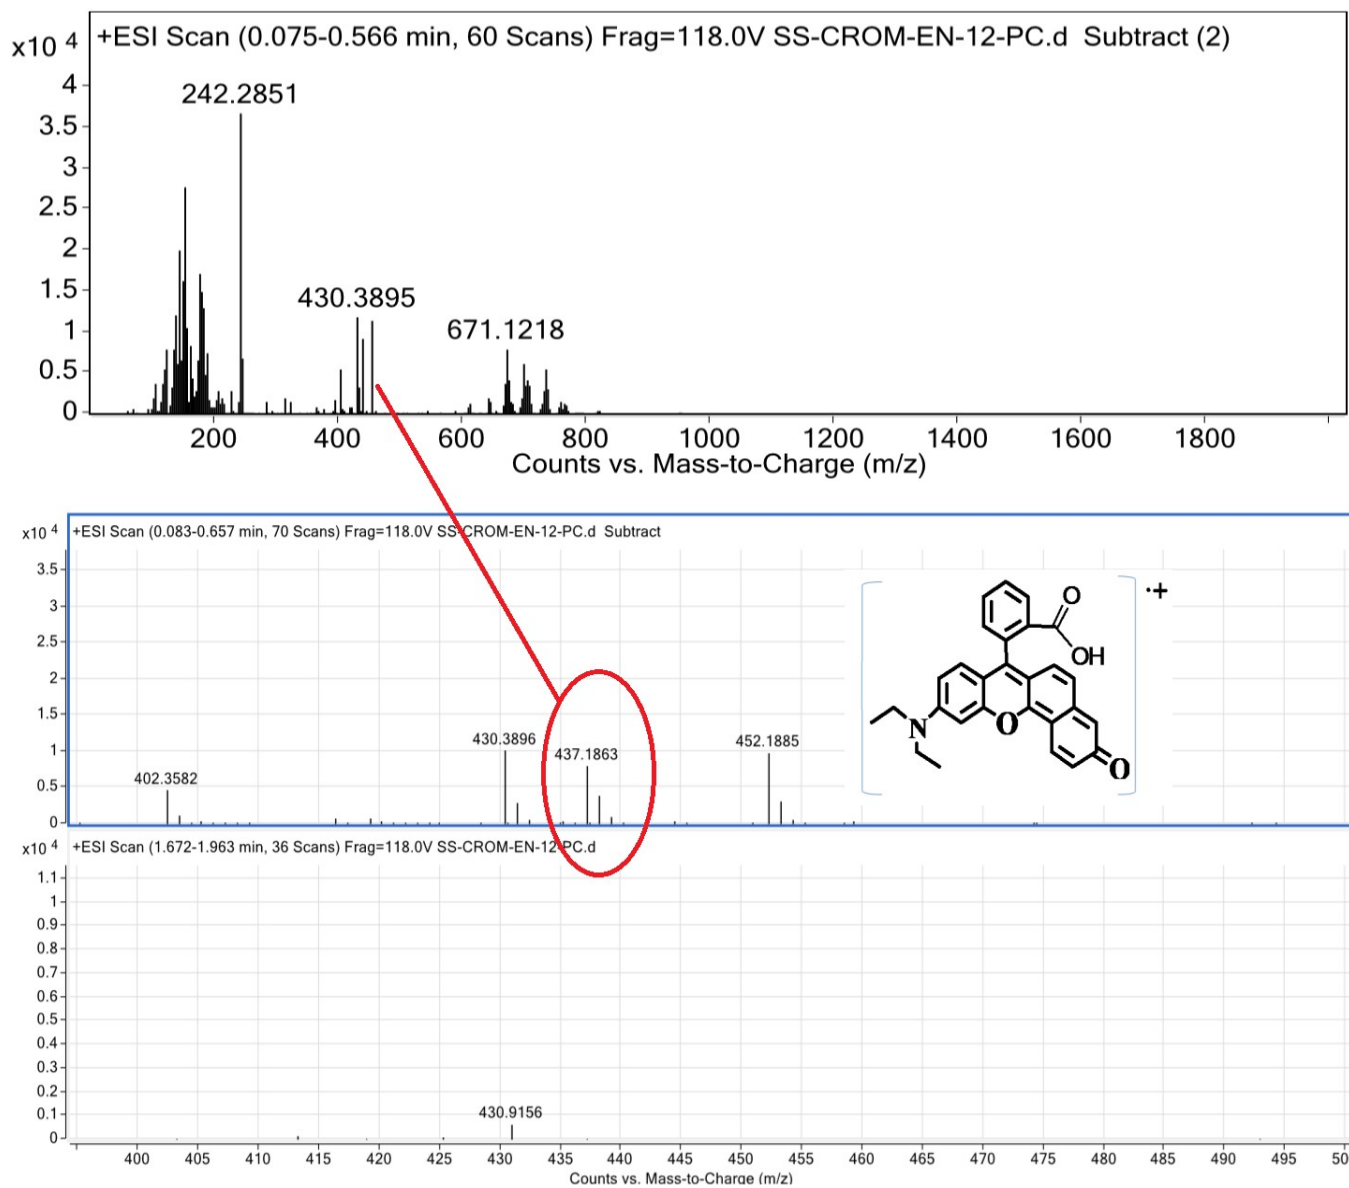

**Fig. S10.** ESI-Mass (Positive Mode) spectrum of **DEB-CO** with **CORM-3**

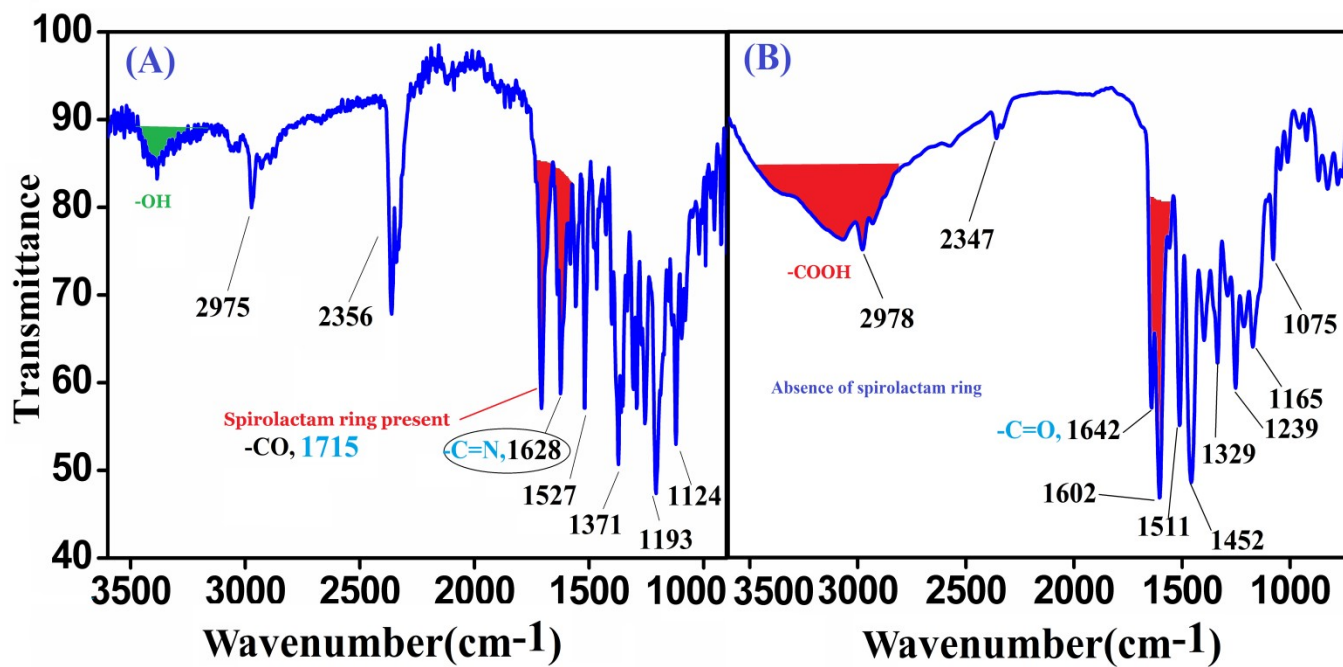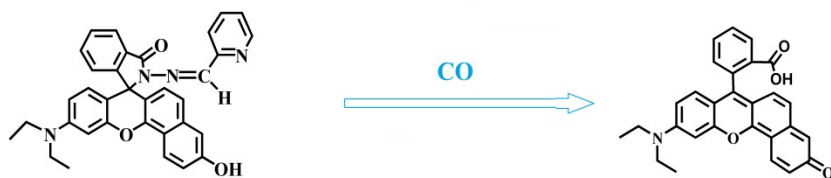

Fig. S11. IR spectra (A) DEB-CO and (B) DEB-CO with CORM-3

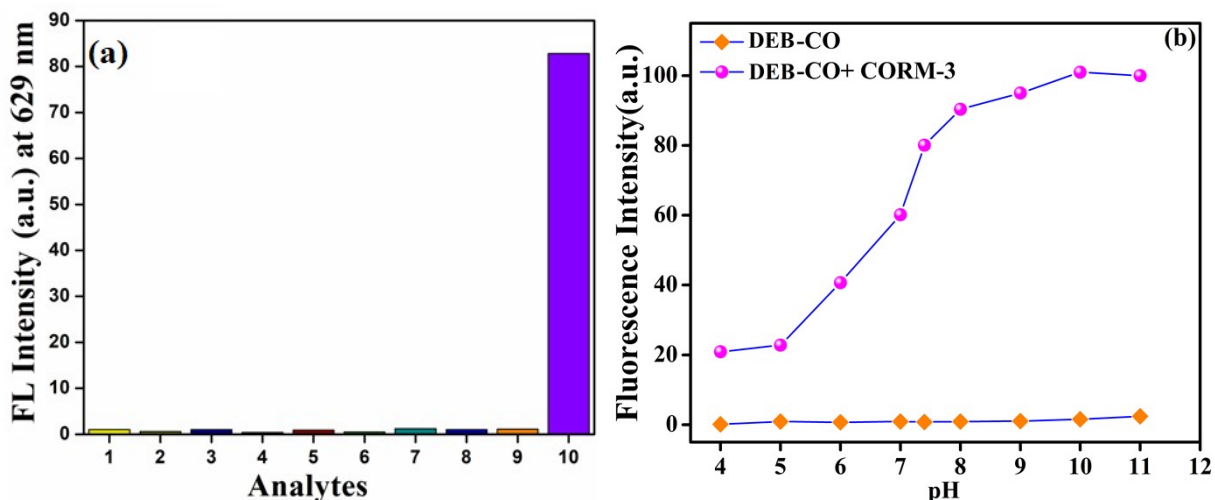

Fig. S12. Fluorescence intensity of DEB-CO toward (a) various biomolecules (1) none, (2) H<sub>2</sub>S (source: NaHS), (3) NO (gas), (4) O<sub>2</sub> (source: KO<sub>2</sub>), (5) <sup>t</sup>BuOOH, (6) NaOCl, (7) H<sub>2</sub>O<sub>2</sub>, (8) HNO, (9) GSH and (10) 100 μM CORM-3. (b) Effects of pH on the fluorescence of DEB-CO (10 μM) with 20 μM CORM-3 at λ<sub>em</sub> ~ 629 nm.

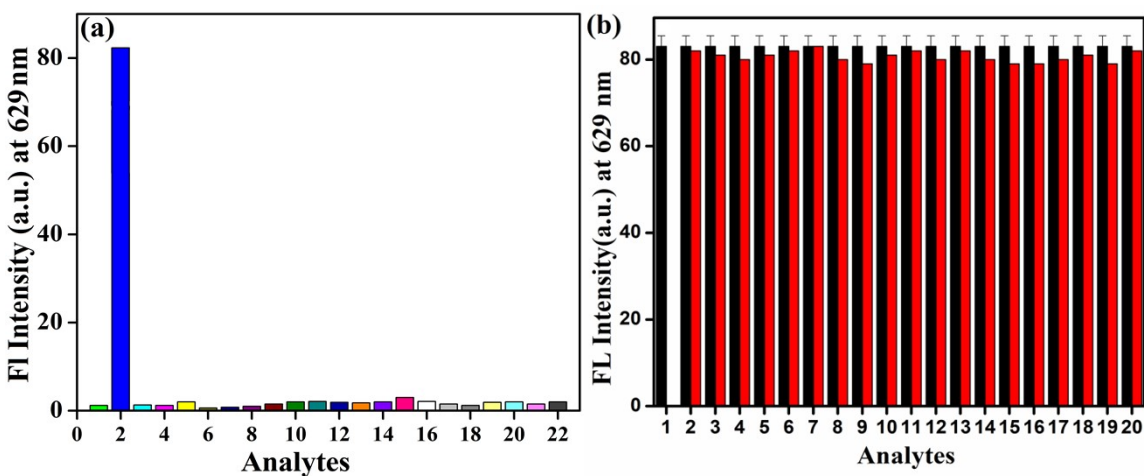

Fig. S13. (a) Fluorescence emission intensities of DEB-CO in the presence of various amino acids and inorganic salt ions in HEPES buffer (10 mM, pH = 7.4 at 37 °C) respectively (1. only DEB-CO, 2. CORM-3, 3. Ala, 4. Asp, 5. Arg, 6. Cys, 7. Gly, 8. Glu, 9. His, 10. Hcy, 11. Lys, 12. Pro, 13. Tyr, 14. Na<sup>+</sup>, 15. Al<sup>3+</sup>, 16. Ca<sup>2+</sup>, 17. Cr<sup>3+</sup>, 18. Fe<sup>2+</sup>, 19. Fe<sup>3+</sup>, 20. Cu<sup>2+</sup>, 21. Hg<sup>2+</sup>, 22. Cd<sup>2+</sup>) (b) Change in fluorescence intensity of DEB-CO (10 μM) in the presence of both CORM-3 (100 μM) and foreign species (100 μM) in HEPES buffer (10 mM, pH = 7.4 at 37 °C) respectively (1. blank, 2. CORM-3, 3. NaOCl, 4. H<sub>2</sub>O<sub>2</sub>, 5. NO, 6. GSH, 7. Gly, 8. Glu, 9. His, 10. Cys, 11. Lys, 12. Pro, 13. Tyr, 14. Cr<sup>3+</sup>, 15. Al<sup>3+</sup>, 16. Fe<sup>2+</sup>, 17. Fe<sup>3+</sup>, 18. Cu<sup>2+</sup>, 19. Hg<sup>2+</sup>, 20. Cd<sup>2+</sup>)

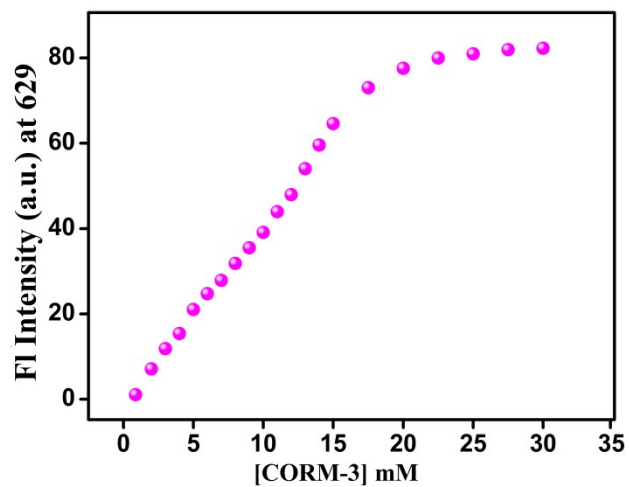

Fig. S14: Fluorescence emission intensities of DEB-CO (10  $\mu$ M) at 629 nm vs. CORM-3 concentration.

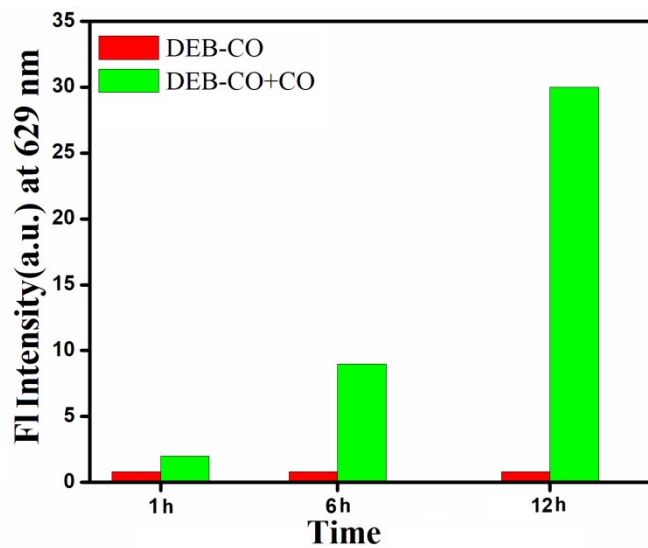

Fig. S15. Fluorescence intensity changes of DEB-CO (10  $\mu$ M) solution after continuous CO gas was ventilation.  $\lambda_{\text{ex/em}} = 580/629$  nm.

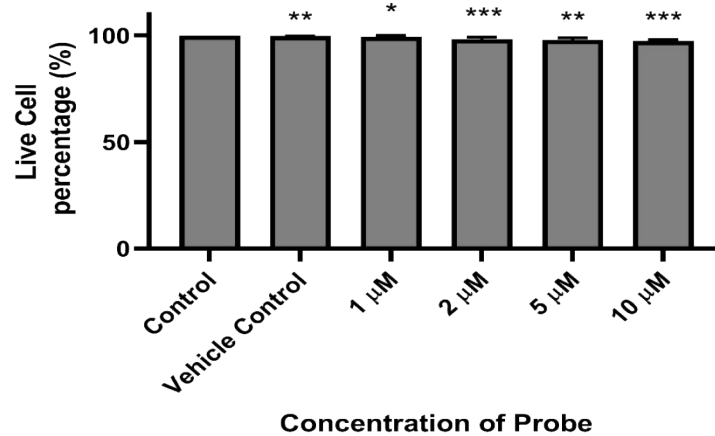

Fig. S16: *Cytotoxicity measurement of the Probe against MCF7 cells.* Live cell percentage was calculated using MTT assay of mcf7 cells. mcf7 cells were treated with different concentrations of drug (1 $\mu\text{M}$ , 2 $\mu\text{M}$ , 5 $\mu\text{M}$ , and 10 $\mu\text{M}$ ) and incubated for 24 hr. Graph showing the live cell percentage of PBMC cells treated with drug compared to control\*, P<0.05, significantly different from the vehicle group

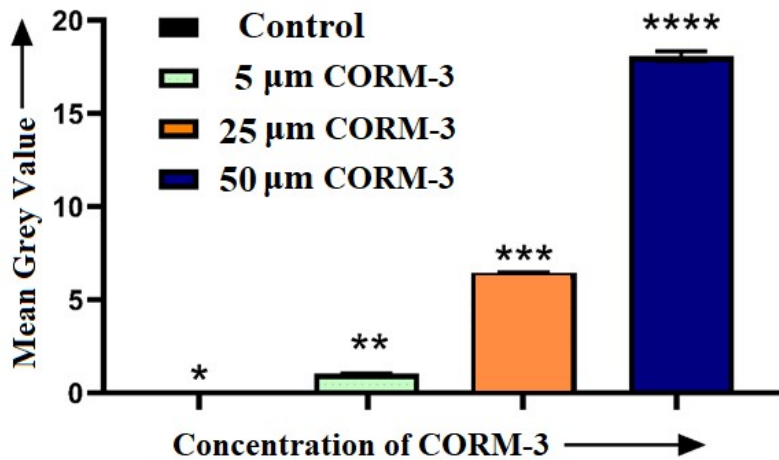

Fig. S17: The mean grey value of the probe at different concentrations.

**Table S1.** Comparison of ‘analytical figure of merit’ with the other previous works

| Entry | $\lambda_{\text{ex}}/\lambda_{\text{em}}$<br>(nm)                                              | Whether metal-free<br>Yes/<br>No | Wheter CO source other than CORM<br>Yes/No | Detection limit (nM) | Whether applicable in living cells<br>Yes/No<br>and about <i>in vitro/in vivo</i> | Ref .                         |   |
|-------|------------------------------------------------------------------------------------------------|----------------------------------|--------------------------------------------|----------------------|-----------------------------------------------------------------------------------|-------------------------------|---|
| 1     | 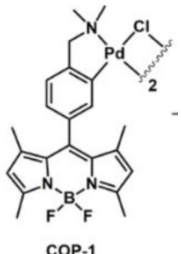<br>COP-1     | 475/503                          | NO                                         | NO                   | Not given                                                                         | Yes, but only <i>in vitro</i> | 1 |
| 2     | <br>CC-CO    | 370/477                          | NO                                         | NO                   | 653                                                                               | Yes, but only <i>in vitro</i> | 2 |
| 3     | <br>PCO-1   | 340/460                          | NO                                         | NO                   | 7.77                                                                              | No                            | 3 |
| 4     | <br>FL-CO-1 | 490/520                          | NO                                         | NO                   | 37                                                                                | Yes, but only <i>in vitro</i> | 4 |

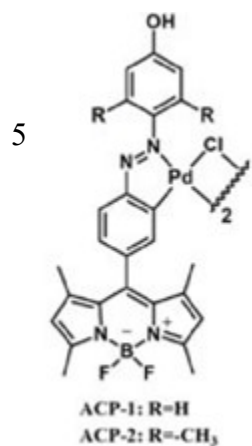

498/512 NO NO 720 Yes, but only *in vitro* 5

6

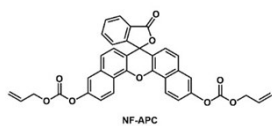

620/670 NO NO 127 Yes, but only *in vitro* 6

7

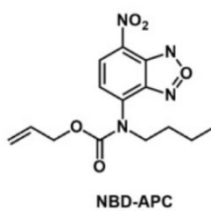

480/549 NO NO 26.3 Yes, but only *in vitro* 7

8

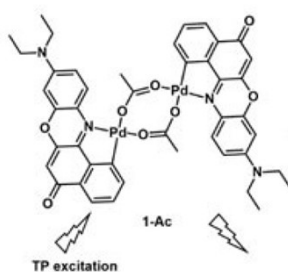

580/660 NO NO 50 Yes, both *in vitro* and *in vivo* 8

9

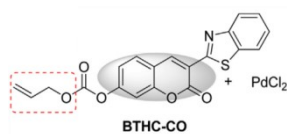

462/490 NO NO 25 Yes, but only *in vitro* 9



|     |                                                                                     |                  |    |    |      |                                              |    |
|-----|-------------------------------------------------------------------------------------|------------------|----|----|------|----------------------------------------------|----|
| 10  | 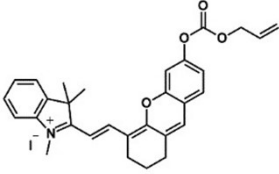   | 670/714          | NO | NO | 3.2  | Yes, both <i>in vitro</i> and <i>in vivo</i> | 10 |
| 11  |    | 430/(545 vs 455) | NO | NO | 17.9 | Yes, but only <i>in vitro</i>                | 11 |
| 12  |   | 565/685          | NO | NO | 57   | Yes, but only <i>in vitro</i>                | 12 |
| 13  |  | 690/736          | NO | NO | 170  | Yes, both <i>in vitro</i> and <i>in vivo</i> | 13 |
| 14  |  | 500/540 vs 610   | NO | NO | 444  | Yes, both <i>in vitro</i> and <i>in vivo</i> | 14 |
| 15. |  | 410/(515 vs 600) | NO | NO | 380  | Yes, both <i>in vitro</i> and <i>in vivo</i> | 15 |

|     |                                                                                     |                  |     |     |     |                                              |    |
|-----|-------------------------------------------------------------------------------------|------------------|-----|-----|-----|----------------------------------------------|----|
| 16. | 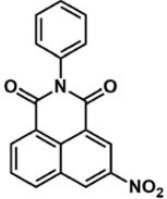   | 440/522          | NO  | NO  | 123 | Yes, but only <i>in vitro</i>                | 16 |
| 17. |    | 530/ 585         | NO  | NO  | 62  | Yes, but only <i>in vitro</i>                | 17 |
| 18. |    | 541/676          | NO  | NO  | 37  | Yes, both <i>in vitro</i> and <i>in vivo</i> | 18 |
| 19. |   | 420/500          | No  | No  | 4   | Yes, both <i>in vitro</i> and <i>in vivo</i> | 19 |
| 20. |  | 420/(545 vs 472) | NO  | Yes | 58  | Yes, both <i>in vitro</i> and <i>in vivo</i> | 20 |
| 21. |  | 440/525          | Yes | NO  | 600 | Yes, but only <i>in vitro</i>                | 21 |
| 22. |  | 580/665          | YES | NO  | 6.1 | Yes, both <i>in vitro</i> and <i>in vivo</i> | 22 |

|     |                       |                 |     |     |       |                                              |          |
|-----|-----------------------|-----------------|-----|-----|-------|----------------------------------------------|----------|
| 23. |                       | 440/520         | Yes | No  | 180   | Yes, but only <i>in vitro</i>                | 23       |
|     | NucFP-NO <sub>2</sub> |                 |     |     |       |                                              |          |
| 24. |                       | 440/655,<br>592 | Yes | No  | 61    | Yes, both <i>in vitro</i> and <i>in vivo</i> | 24       |
| 25. |                       | 558/578         | Yes | Yes | 10    | Yes, but only <i>in vitro</i>                | 25       |
|     | RCO                   |                 |     |     |       |                                              |          |
| 26. |                       | 620/712         | Yes | No  | 103   | Yes, both <i>in vitro</i> and <i>in vivo</i> | 26       |
| 27. |                       | 580/623         | Yes | Yes | 64.29 | Yes, both <i>in vitro</i> and <i>in vivo</i> | Our Work |

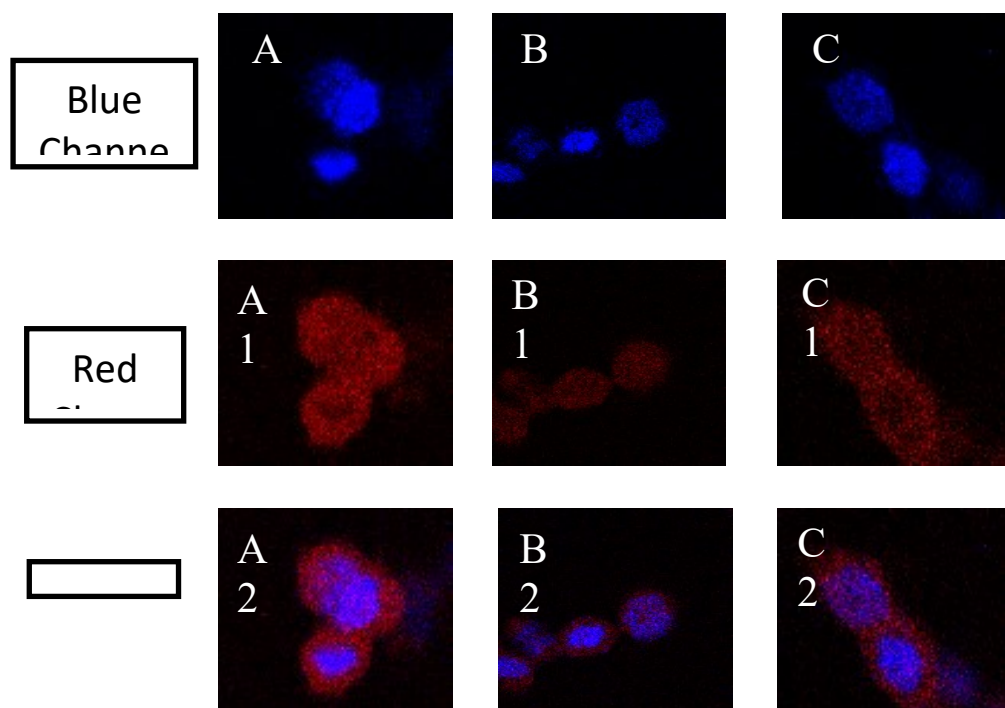

Fig. S18: Fluorescent images of CO in the living different single MCF7 cells coincubated with **DEB-CO** probe (10  $\mu$ M), DAPI (for staining) and CORM-3(50  $\mu$ M).

## References

- 1 B. W. Michel, A. R. Lippert, C. J. Chang , A Reaction-Based Fluorescent Probe for Selective Imaging of Carbon Monoxide in Living Cells Using a Palladium-Mediated Carbonylation, *J. Am. Chem. Soc.*, 2012, **134**, 15668.
- 2 K. Zheng, W. Lin, L. Tan, H. Chen, H. Cui , A unique carbazole-coumarin fused two-photon platform: development of a robust two-photon fluorescent probe for imaging carbon monoxide in living tissues, *Chem. Sci.*, 2014, **5**, 3439.
- 3 S. Pal, M. Mukherjee, B. Sen, S. K. Mandal, S. Lohar, P. Chattopadhyaya , K. Dhara, A new fluorogenic probe for the selective detection of carbon monoxide in aqueous medium based on Pd(0) mediated reaction, *Chem. Commun.*, 2015, **51**, 4410.
- 4 W. Feng, D. Liu, S. Feng, G. Fen, Readily Available Fluorescent Probe for Carbon Monoxide Imaging in Living Cells, *Anal. Chem.*, 2016, **88**, 10648.
- 5 Y. Li, X. Wang ,J. Yang, X. Xie, M. Li, J. Niu, L. Tong, B. Tang, Fluorescent Probe Based on Azobenzene-Cyclopalladium for the Selective Imaging of Endogenous Carbon Monoxide under Hypoxia Conditions, *Anal. Chem.*, 2016, **88**, 11154.
- 6 J. W. Yan, J. Y. Zhu, Q. F. Tan, L. F. Zhou, P. F. Yao, Y. T. Lu, J. H. Tan , L. Zhang, Development of a colorimetric and NIR fluorescent dual probe for carbon monoxide, *RSC Adv.*, 2016, **6**, 65373.
- 7 Z. Xu, J. Yan, J. Li, P. Yao, J. Tan, L. Zhang, A colorimetric and fluorescent turn-on probe for carbon monoxide and imaging in living cells, *Tetrahedron Lett.*, **2016**, **57**, 2927–2930.

- 8 K. Liu, X. Kong, Y. Ma, W. Lin, Rational design of a robust fluorescent probe for the detection of endogenous carbon monoxide in living zebrafish embryos and mouse tissue, *Angew. Chem. Int. Ed.*, **2017**, **56**, 13489–13492
- 9 W. Feng, D. Liu, Q. Zhai, G. Feng, Lighting up carbon monoxide in living cells by a readily available and highly sensitive colorimetric and fluorescent probe, *Sens. Actuators B.*, 2017, **240**, 625–630.
- 10 W. Feng, G. Feng, A readily available colorimetric and near-infrared fluorescent turn-on probe for detection of carbon monoxide in living cells and animals, *Sens. Actuators B.*, 2018, **255**, 2314–2320.
- 11 Z. Wang, Z. Geng, Z. Zhao, W. Sheng, C. Liu, X. Lv, Q. He, B. Zhu, A highly specific and sensitive ratiometric fluorescent probe for carbon monoxide and its bioimaging applications, *New J. Chem.*, **2018**, **42**, 14417–14423
- 12 L. Yan, D. Nan, C. Lin, Y. Wan, Q. Pan, Z. Qi, A near-infrared fluorescent probe for rapid detection of carbon monoxide in living cells, *Spectrochim. Acta A.*, 2018, **202**, 284–289
- 13 S. J. Li, D. Y. Zhou, Y. F. Li, B. Yang, J. O. Yang, J. Jie, J. Liu, C. Y. Li, Mitochondria-targeted near-infrared fluorescent probe for the detection of carbon monoxide in vivo, *Talanta.*, 2018, **188**, 691–700.
- 14 Z. Tang, B. Song, H. Ma, T. Luo, L. Guo, J. Yuan, Mitochondria-targetable ratiometric time-gated luminescence probe for carbon monoxide based on lanthanide complexes, *Anal. Chem.*, 2019, **91**, **4**, 2939–2946.
- 15 B. Biswas, M. Venkateswarulu, S. Sinha, K. Girdhar, S. Ghosh, S. Chatterjee, P. Mondal, S. Ghosh, Long Range Emissive Water-Soluble Fluorogenic Molecular Platform for Imaging Carbon Monoxide in Live Cells, *ACS Appl. Bio Mater.*, 2019, **2**, 5427–5433.
- 16 B. Das, S. Lohar, A. Patra, E. Ahmmed, S. Mondal, J. N. Bhakta, K. Dhara, P. Chattopadhyay, A naphthalimide-based fluorescence "turn-on" chemosensor for highly selective detection of carbon monoxide: imaging applications in living cells, *New J. Chem.*, 2018, **42**, 13497–13502.
- 17 Y. Zhang, X. Kong, Y. Tang, M. Li, Y. Yin, W. Lin, The development of a hemicyanine-based ratiometric CO fluorescent probe with a long emission wavelength and its applications for imaging CO in vitro and in vivo, *New J. Chem.*, 2020, **44**, 12107–12112.
- 18 J. Hong, Q. Xia, E. Zhou, G. Feng, NIR fluorescent probe based on a modified rhodol-dye with good water solubility and large Stokes shift for monitoring CO in living systems, *Talanta.*, 2020, **215**, 120914.
- 19 Z. Li, C. Yu, Y. Chen, Z. Zhuang, B. Tian, C. Liu, P. Jia, H. Zhu, Y. Yu, X. Zhang, W. Sheng, B. Zhu, A novel Pd<sup>2+</sup>-free highly selective and ultrasensitive fluorescent probe for detecting CO-releasing molecule-2 in live cells and zebrafish, *Dyes Pigm.*, 2020, **174**, 108040.
- 20 W. Feng, D. Liu, Q. Zhai, G. Feng, Lighting up carbon monoxide in living cells by a readily available and highly sensitive colorimetric and fluorescent probe, *Sens. Actuators B.*, 2017, **251**, 389.
- 21 K. Dhara, S. Lohar, A. Patra, P. Roy, S.K. Saha, G.C. Sadhukhan, P. Chattopadhyay, A New Lysosome Targetable Turn-On Fluorogenic Probe for Carbon Monoxide Imaging in Living Cells. *Anal. Chem.*, 2018, **90**, 2933–2938.
- 22 Z. K. Wang, C. Y. Liu, X. Wang, Q. X. Duan, P. Jia, H. C. Zhu, Z. L. Li, X. Zhang, X. H. Ren, B. C. Zhu, W. L. Sheng, A metal-free near-infrared fluorescent probe for tracking the glucose-induced fluctuations of carbon monoxide in living cells and zebrafish, *Sens. Actuators B.*, 2019, **291**, 329–336.
- 23 A. Sarkar, C. Fouzder, S. Chakraborty, E. Ahmmed, R. Kundu, S. Dam, P. Chattopadhyay, K. Dhara, A Nuclear-Localized Naphthalimide-Based Fluorescent Light-Up Probe for Selective Detection of Carbon Monoxide in Living Cells, *Chem. Res. Toxicol.*, 2020, **33**, **2**, 651–656
- 24 E. Zhou, S. Gong, J. Hong, G. Feng, Development of a new ratiometric probe with near-infrared fluorescence and a large Stokes shift for detection of gasotransmitter CO in living cells, *Spectrochim. Acta Part A.*, 2020, **227**, 117657.

- 25 C. Zhang, H. Xie, T. Zhan, J. Zhang, B. Chen, Z. Qian, G. Zhang, W. Zhang, J. Zhou, A New Mitochondrion Targetable Fluorescence Probe for Carbon Monoxide-Specific Detection and Live Cell Imaging. *Chem. Commun.*, 2019, **55**, 9444-9447.
- 26 H. Xu, S. Zong, H. Xu, X. Tang, Z. Li, Detection and Imaging of Carbon Monoxide Releasing Molecule-2 in HeLa Cells and Zebrafish Using a Metal-Free Near-Infrared Fluorescent off-on Probe, *Spectrochim. Acta Part A.*, 2022, **272**, 120964.
